# Supplementary material
Source: publisher site journal article supplement (https://www.dovepress.com/article/574112)
Supplement: Supplementary file 1 [file 574112%20Revised%20Supplementary%20Material.docx]

**Supplementary Table 1** NEI VFQ-25 questionnaire, 6 selected key question responses at 3 months.

| **Questions** | **Points** | **1** | **2** | **3** | **4** | **5** |
| --- | --- | --- | --- | --- | --- | --- |
| **Q1 (Quality of Vision)** | | | | | | |
| At the present time, would you say your eyesight using both eyes is? | Excellent > 1 Good > 2 Fair > 3 Poor > 4 | 17 | 34 | 0 | 0 | - |
| How much difficulty do you have viewing objects on both sides (e.g., moving cars and pedestrians on either side)? | No difficulty at all > 1 A little difficulty > 2 Moderate difficulty > 3 Extreme difficulty > 4 | 51 | 0 | 0 | 0 | - |
| **Q2 (Near Vision)** | | | | | | |
| How much difficulty do you have reading content on your phone or in a newspaper? Would you say you have: | No difficulty at all > 1 A little difficulty > 2 Moderate difficulty > 3 Extreme difficulty > 4 Stopped doing this because of your eyesight > 5 | 49 | 1 | 1 | 0 | 0 |
| **Q3 (Night Vision)** | | | | | | |
| Is it necessary for you to wear glasses or contact lenses while driving at night? | Never needed > 1 Sometimes needed > 2 Always needed > 3 Never driven at night due to vision problems > 4 Never driven at night due to other reasons (non-vision) > 5 | 50 | 1 | 0 | 0 | 0 |
| how much difficulty do you have adjusting to the dark when moving from a well-lit place to a dark one (e.g., entering a dark movie theater)? | No difficulty at all > 1 A little difficulty > 2 Moderate difficulty > 3 Extreme difficulty> 4 | 40 | 10 | 1 | 0 | 0 |
| **Q4 (Halos and Glare)** | | | | | | |
| How much of the time do you see halos around bright lights that distract you? | None of the time > 1 A little of the time > 2 Some of the time > 3 Most of the time > 4 All of the time > 5 | 34 | 16 | 1 | 0 | 0 |
| How much of the time do you experience glare in the past 4 weeks? | None of the time > 1 A little of the time > 2 Some of the time > 3 Most of the time > 4 All of the time > 5 | 30 | 17 | 3 | 1 | 0 |
| **Q5 (Comfort)** | | | | | | |
| How much discomfort have you had in and around your eyes (for example, burning, itching, or aching) in the past 4 weeks? Would you say it is: | None > 1 Mild > 2 Moderate > 3 Severe > 4 Very severe > 5 | 20 | 23 | 8 | 0 | 0 |
| **Q6 (Dry Eyes)** | | | | | | |
| How severe is the impact of dry eyes on you? | None > 1 Mild > 2 Moderate > 3 Severe > 4 Very severe > 5 | 20 | 20 | 4 | 5 | 2 |
